# Supplementary material for: The hidden ecological resource of andic soils in mountain ecosystems: evidence from Italy
Source: Copernicus journal article supplement (doi:10.5194/se-9-63-2018), 2018-01-31
Supplement: Supplementary file 1 [file se-9-63-2018-supplement.pdf]

Supplement of Solid Earth, 9, 63–74, 2018  
<https://doi.org/10.5194/se-9-63-2018-supplement>  
© Author(s) 2018. This work is distributed under  
the Creative Commons Attribution 4.0 License.

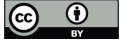

*Supplement of*

## **The hidden ecological resource of andic soils in mountain ecosystems: evidence from Italy**

**Fabio Terribile et al.**

*Correspondence to:* Fabio Terribile (terribilesci@gmail.com)

The copyright of individual parts of the supplement might differ from the CC BY 4.0 License.

Table S1. Supplementary Material. Main features of the site description concerning the 35 soils.

| Soil N. | Location                     | Soil classification *             | Land use  | Elevation | Slope ** | Aspect |
|---------|------------------------------|-----------------------------------|-----------|-----------|----------|--------|
| 1       | Orobie Alps                  | Haplic Phaeozem                   | chestnut  | 535       | 40       | N      |
| 2       | Penna Mountain               | Epidystric Aluandic Andosol       | beach     | 1400      | 50       | N      |
| 3       | Orocco Mountain              | Epidystric Cambisol               | grassland | 1070      | 30       | N      |
| 4       | Notte Mountain               | Haplic Epidystric Cambisol        | chestnut  | 720       | 23       | W      |
| 5       | Battifollo                   | Haplic Epidystric Cambisol        | chestnut  | 820       | 27       | N      |
| 6       | Spigolino Mountain           | Epidystric Cambisol               | grassland | 1625      | 15       | S      |
| 7       | Abetone                      | Epidystric Cambisol               | beach     | 850       | 28       | N      |
| 8       | Abetone                      | Haplic Epidystric Cambisol        | chestnut  | 850       | 28       | N      |
| 9       | Pratone Mountain             | Epidystric Cambisol               | beach     | 1010      | 50       | N      |
| 10      | Garfagnana                   | Haplic Epidystric Cambisol        | chestnut  | 220       | 30       | S      |
| 11      | Versilia                     | Epidystric Chromic Cambisol       | chestnut  | 375       | 50       | N      |
| 12      | Versilia                     | Epidystric Hyperferralic Cambisol | chestnut  | 610       | 50       | N      |
| 13      | Simoncello Mountain          | Endoeutric Cambisol               | oak       | 990       | 20       | S      |
| 14      | Aretini Mountains            | Epidystric Humic Cambisol         | chestnut  | 950       | 20       | W      |
| 15      | Nerone Mountain              | Haplic Phaeozem                   | grassland | 1370      | 40       | S      |
| 16      | Subasio Mountain             | Calcaric Epileptic Phaeozem       | grassland | 1160      | 15       | W      |
| 17      | Sibillini Mountains          | Haplic Phaeozem                   | grassland | 1490      | 40       | E      |
| 18      | Terminillo Mountain          | Andic Cambisol                    | grassland | 1900      | 50       | S      |
| 19      | Simbruini Mountains          | Epidystric Cambisol               | beach     | 1480      | 15       | N      |
| 20      | Pizzalto Mountain            | Eutric Cambisol                   | oak       | 1360      | 12       | N      |
| 21      | Umbra Forest                 | Eutric Cambisol                   | oak       | 260       | 4        | N      |
| 22      | Umbra Forest                 | Mollic Silandic Andosol           | beach     | 755       | 50       | N      |
| 23      | Greco Mountain               | Mollic Silandic Andosol           | grassland | 1425      | 35       | E      |
| 24      | Umbra Forest                 | Eutrosilic Silandic Andosol       | grassland | 600       | 0        | 0      |
| 25      | <sup>1</sup> Matese Mountain | Mollic Silandic Andosol           | beach     | 1410      | 36       | SE     |
| 26      | <sup>2</sup> Matese Mountain | Silandic Andosol                  | beach     | 1150      | 19       | N      |
| 27      | Maggiore Mountain            | Silandic Andosol                  | oak       | 790       | 15       | SE     |
| 28      | Cervinara Mountain           | Eutrosilic Silandic Andosol       | chestnut  | 825       | 50       | NE     |
| 29      | Picentini Mountains          | Mollic Silandic Andosol           | beach     | 1390      | 45       | NO     |
| 30      | Amalfitana Cost Range        | Endoleptic Silandic Andosol       | oak       | 275       | 50       | E      |
| 31      | Lucano Apenine               | Haplic Phaeozem                   | beach     | 1360      | 43       | SE     |
| 32      | Cervati Mountain             | Mollic Silandic Andosol           | beach     | 1655      | 25       | S      |
| 33      | Chianello Mountain           | Eutrosilic Silandic Andosol       | chestnut  | 890       | 20       | N      |
| 34      | Macomer                      | Endoleptic Phaeozem               | oak       | 685       | 0        |        |
| 35      | Aspromonte Massif            | Silandic Andosol                  | beach     | 970       | 9        | SE     |

\* = following IUSS Working Group WRB, 2015; \*\* slope % has been measured at each soil site (generally 10m<sup>2</sup>) then it can strongly differ from the slope of the landscape (typically < 21%). Abbrev. <sup>1</sup>ISCRIC, 2005; <sup>2</sup>Frezzotti and Narcisi, 1996

Table S2. Supplementary Material. Main analytical features of the 35 soils.

| Soil N. | Horizon sequence                  | Soil Depth | Colour A horizon (dry) | Colour B horizon (dry) | Org. C *<br>g kg <sup>-1</sup> | Al <sub>o</sub> +0.5Fe <sub>o</sub> *<br>% | Al <sub>o</sub> +0.5Fe <sub>o</sub> %<br>(max value) | P retention *<br>% |
|---------|-----------------------------------|------------|------------------------|------------------------|--------------------------------|--------------------------------------------|------------------------------------------------------|--------------------|
| 1       | A, Bw                             | 70         | 10YR 3/2               | 10YR 4/4               | 16.26                          | 1.42                                       | 1.42                                                 | 21.84              |
| 2       | A1, A2, B/A, Bw1, Bw2             | 110+       | 10YR 2/2               | 10YR 4/4               | 64.37                          | 2.88                                       | 3.21                                                 | 94.96              |
| 3**     | A, Bw1, Bw2, B/C                  | 65+        | 7.5YR 4/2              | 10YR 4/4               | 24.39                          | 0.91                                       | 1.00                                                 | 38.64              |
| 4       | A, Bw1, Bw2, Bw3                  | 75+        | 10YR 2/2               | 7.5YR 4/6              | 17.55                          | 0.66                                       | 0.71                                                 | 40.37              |
| 5**     | A, Bw1, Bw2, Bt                   | 75+        | 7.5YR 3/2              | 5YR 4/6                | 9.44                           | 0.38                                       | 0.43                                                 | 36.79              |
| 6**     | OA, A, Bw, B/C                    | 60+        | 10YR 2/1               | 7.5YR 4/6              | 45.05                          | 1.40                                       | 1.54                                                 | 59.19              |
| 7**     | A, Bw1, Bw2, Bw3, Bw4             | 90         | 5YR 3/1                | 7.5YR 4/6              | 26.70                          | 1.07                                       | 1.25                                                 | 60.60              |
| 8       | A, Bw1, Bw2, Bw3, Bw4             | 90+        | 5YR 3/1                | 7.5YR 4/6              | 26.70                          | 1.07                                       | 1.25                                                 | 60.63              |
| 9       | A/B, Bw1, Bw2, Bw3                | 70+        | 10YR 3/2               | 10YR 4/4               | 12.67                          | 0.95                                       | 1.10                                                 | 45.14              |
| 10**    | A, Bw                             | 50+        | 10YR 3/2               | 10YR 4/4               | 31.24                          | 0.80                                       | 0.87                                                 | NA                 |
| 11      | OA, Bw1, Bw2                      | 150+       | 10YR 2/1               | 7.5YR 4/6              | 13.22                          | 0.79                                       | 1.03                                                 | 38.69              |
| 12      | OA, Bw1, Bw2, 2CB                 | 90+        | 10YR 2/1               | 2.5 YR 5/4             | 23.92                          | 0.78                                       | 0.90                                                 | 20.09              |
| 13      | A, Bw1, Bw2, C/B                  | 70+        | 10YR 3/2               | 7.5YR 5/4              | 6.96                           | 0.52                                       | 0.77                                                 | 27.19              |
| 14      | A, B/A, Bw                        | 70+        | 10YR 3/3               | 10YR 4/6               | 28.59                          | 1.35                                       | 1.39                                                 | 58.08              |
| 15**    | A, Bw1, Bw2, C/B                  | 90+        | 10YR 3/2               | 10YR 3/3               | 33.62                          | 0.97                                       | 1.07                                                 | 39.51              |
| 16**    | A1, A2                            | 27         | 7.5YR 2.5/2            | 7.5YR 2.5/2            | 75.89                          | 0.90                                       | 0.92                                                 | 47.81              |
| 17**    | A1, A2, Ab, Bwb                   | 75+        | 10YR 2/2               | 7.5YR 2.4/3            | 57.11                          | 1.45                                       | 1.68                                                 | 60.44              |
| 18**    | A1, A2, Bw                        | 90         | 10YR 2/1               | 10YR 3/3               | 65.28                          | 2.01                                       | 2.47                                                 | 75.08              |
| 19**    | A, Bw1, Bw2, Bt                   | 110+       | 7.5YR 3/1              | 7.5YR 4/3              | 25.56                          | 1.56                                       | 1.80                                                 | 75.08              |
| 20      | AB, Bw                            | 60+        | 10YR 3/2               | 10YR 3/2               | 35.46                          | 1.00                                       | 1.03                                                 | 48.22              |
| 21      | A, Bw1, Bw2                       | 60+        | 5YR 3/3                | 7.5YR 4/4              | 44.68                          | 0.75                                       | 0.80                                                 | NA                 |
| 22      | A1, A2, AB, Bt                    | 95+        | 10YR 3/2               | 10YR 4/4               | 22.99                          | 1.63                                       | 3.17                                                 | NA                 |
| 23      | A1, A2, Ab, ABb                   | 110        | 7.5YR 3/2              | 10YR 4/3               | 102.56                         | 2.83                                       | 3.59                                                 | 81.57              |
| 24      | A, Ab, 2Ab, 2Bt                   | 85+        | 7.5YR 3/1              | 7.5YR 4/3              | 40.75                          | 1.51                                       | 2.07                                                 | NA                 |
| 25      | A, Bw                             | 150+       | 7.5YR 2/2              | 10YR 4/6               | 79.20                          | 5.28                                       | 5.60                                                 | 99.00              |
| 26      | A1, A2, Bw1, Bw2, BC1, BC2        | 110+       | NA                     | NA                     | 25.10                          | 5.50                                       | 6.25                                                 | 98.89              |
| 27      | A, Bw1, Bw2                       | 160+       | 10YR 2/2               | 7.5YR 3/3              | 25.20                          | 3.45                                       | 4.57                                                 | 102.00             |
| 28      | A, Bw1, Bw2, Ab, Bwb1, Bwb2, Bwb3 | 170+       | NA                     | NA                     | 21.00                          | 7.37                                       | 5.96                                                 | 83.32              |
| 29      | A, Bw                             | 90+        | 10YR 2/2               | 7.5YR 3/3              | 42.30                          | 4.44                                       | 5.26                                                 | 105.00             |
| 30      | A, Bw1, Bw2, Bw3                  | 70         | 10YR 2/2               | 10YR 3/4               | 21.52                          | 4.58                                       | 5.47                                                 | 71.67              |
| 31      | A, Bw                             | 70+        | 10YR 3/2               | 10YR 4/4               | 49.50                          | 1.19                                       | 1.43                                                 | 68.00              |
| 32      | A, Bw                             | 85+        | 10YR 2/1               | 7.5YR 3/3              | 74.00                          | 2.70                                       | 3.13                                                 | 102.00             |
| 33      | A1, A2, Bw1, Bw2, Bw3             | 108+       | 7.5YR 2.5/1            | 7.5YR 4/3              | 47.19                          | 2.98                                       | 6.27                                                 | NA                 |
| 34      | A1, A2, Bw                        | 70         | 10YR 2/1               | 10YR 2/2               | 71.57                          | 0.39                                       | 0.48                                                 | 58.28              |
| 35      | A1, A2, Bw                        | 140+       | 10YR 2/2               | 10YR 4/6               | 25.00                          | 1.20                                       | 2.21                                                 | 64.00              |

\* Mean data weighted for soil depth, \*\* sampled for soil hydrology
